# 1 Frank-Starling Mechanism and Short-Term 2 Adjustment of Cardiac Flow

3

4 **Running Title:** Filling-force mechanism and flow adjustment

5

6 *José Guilherme Chaui-Berlinck<sup>1\*</sup> and Luiz Henrique Alves Monteiro<sup>2,3</sup>*

7

8 1 Department of Physiology – Energetics and Theoretical Physiology Laboratory

9 Biosciences Institute - University of São Paulo

10 Rua do Matão, 101; CEP: 05508-090

11 São Paulo – SP/Brasil

12 2 Escola de Engenharia da Universidade Presbiteriana Mackenzie

13 São Paulo – SP/Brasil

14 3 Escola Politécnica da Universidade de São Paulo

15 São Paulo – SP/Brasil

16

17 \*Corresponding author: José Guilherme Chaui-Berlinck – [jgcb@usp.br](mailto:jgcb@usp.br)

18

19 **Keywords:** Cardiovascular system; Dynamical system; Filling-force mechanism;

20 Frank-Starling law; Heart; Stability

21

## 22 **Summary Statement**

23 We address the role of the Frank-Starling mechanism and show that it has no

24 role in the stability of the circulatory system. Rather, it accounts for decreasing

25 the controlling effort and speeding up changes in cardiac output.

26

## 27 **Abstract**

28 The Frank-Starling Law of the heart is a filling-force mechanism, a positive  
29 relationship between the distension of a ventricular chamber and its force of  
30 ejection. The functioning of the cardiovascular system is usually described by  
31 means of two intersecting curves: the cardiac and vascular functions, the former  
32 related to the contractility of the heart and the latter related to the after-load  
33 imposed to the ventricle. The crossing of these functions is the so-called  
34 operation point, and the filling-force mechanism is supposed to play a stabilizing  
35 role for the short-term variations in the working of the system. In the present  
36 study, we analyze whether the filling-force mechanism is responsible for such a  
37 stability within two different settings: one-ventricle, as in fishes, and two-ventricle  
38 hearts, as in birds and mammals. Each setting was analyzed under two  
39 scenarios: presence of the filling-force mechanism and its absence. To approach  
40 the query, we linearized the region around an arbitrary operation point and put  
41 forward a dynamical system of differential equations to describe the relationship  
42 among volumes of ventricular chambers and volumes of vascular beds in face of  
43 blood flows governed by pressure differences between adjacent compartments.  
44 Our results show that the filling-force mechanism is not necessary to give stability  
45 to an operation point. The results indicate that the role of the filling-force  
46 mechanism is related to decrease the controlling effort over the circulatory  
47 system, to smooth out perturbations and to guarantee faster transitions among  
48 operation points.

49

50

## 51 List of Symbols and Abbreviations

### Symbol or Abbreviation

|           |                         |
|-----------|-------------------------|
| FFm       | filling-force mechanism |
| OP        | operation point         |
| V         | blood volume            |
| P         | pressure                |
| R         | resistance              |
| $\beta$   | capacitance             |
| $\dot{q}$ | flow                    |
| F         | coefficient of force    |

### subscripts

|   |                        |
|---|------------------------|
| T | total                  |
| j | a general compartment  |
| k | fixed-force scenario   |
| H | one-ventricle chamber  |
| S | systemic vascular bed  |
| G | pulmonary vascular bed |
| L | left ventricle         |
| R | right ventricle        |

52

53

## 54 Introduction

55 The nowadays-called Frank-Starling Law, or Heart Law, has a long history, being  
56 known since the beginning of 1830 (Katz, 2002). Such a “law” is a relationship  
57 between the filling of a ventricle and the force of contraction it develops (e.g.,  
58 (Holubarsch et al., 1996)). In this way, it is also known as the heart filling-force  
59 relationship (Katz, 2002; Saks et al., 2006), the length-dependent activation  
60 (Solaro, 2007), or, even, the stretch-activation/calcium-activation (Campbell and  
61 Chandra, 2006). And despite the fact that fishes regulate cardiac output mainly  
62 by changes in stroke volume while mammals and birds control mainly heart rate,  
63 the filling-force mechanism (FFm) is found across all vertebrate classes (Shiels  
64 and White, 2008).

65 The relationship between length and force in the heart resembles the same  
66 relationship occurring in skeletal muscles. However, the steepness of the curve  
67 obtained for the heart suggested that beyond myofilament overlapping, there  
68 should be other, or others, mechanism involved in the phenomenon. Indeed, a  
69 calcium-activation process is fundamental for the increase in force due to an  
70 increase in length (e.g., (Moss and Fitzsimons, 2002; Niederer and Smith, 2009;  
71 Saks et al., 2004)). Be that as it may, it is important to note that the FFm is  
72 inherent to the heart cells themselves, without the participation of extrinsic  
73 controls as neural or hormonal ones. As stated in the opening of the review by  
74 Shiels and White (Shiels and White, 2008), “The Frank-Starling mechanism is an  
75 intrinsic property of all vertebrate cardiac tissue”.

76 Guyton and co-workers conceived an invaluable static approach to address the  
77 functioning of the cardiovascular system. We qualitatively illustrate this approach  
78 in Fig. 1A, where the abscises axis is the central venous pressure and the  
79 ordinate axis is the cardiac output. There, it can be seen two curves: the cardiac  
80 function (the ascending one) and the vascular function (the descending one).

81 The cardiac function ultimately represents the filling-force mechanism discussed  
82 above, since an increase in central venous pressure would elicit an increase in  
83 ventricular volume during the diastolic phase of cardiac cycle – which, in turn,  
84 would increase the contraction force resulting in an increase in cardiac output.

85 The vascular curve is, in fact, plotted the other way around as it is truly obtained  
86 (the experimental procedure is to cause changes in flow and measure the  
87 resulting pressure), and represents the dependence of central venous pressure  
88 in relation to blood flow (for details and insightful discussions of this subject, see  
89 (Bregelmann, 2003; Levy and Pappano, 2007)). The crossing of the two curves  
90 is the so-called operation point (OP) of the cardiovascular system.

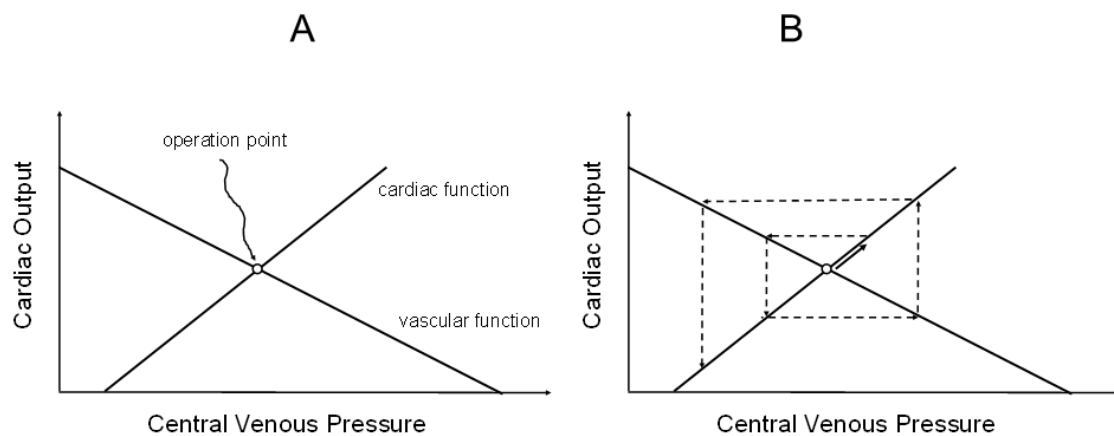

91

92 **Figure 1. Cardiovascular operation point. (A)** Usual representation of the cardiac and vascular  
93 functions resulting in an operation point of the heart. **(B)** Pictorial representation of a non-stable  
94 equilibrium (operation) point (an unstable focus in this case). The solid arrow represents an  
95 arbitrary perturbation from the operation point; the dashed lines represent a possible evolution  
96 path. This path is only for illustrative purposes and based on a cobwebbing approach of discrete  
97 dynamical systems.

98

99 Now, many textbooks and papers consider, implicit or explicitly, the OP as a  
100 stable equilibrium point, and that the FFm is responsible for such a stability. Let  
101 us give some examples.

- 102 – "... [OP] represent the stable values of cardiac output and central venous  
103 pressure at which the system tends to operate. Any perturbation ...  
104 institutes a sequence of changes in cardiac output and venous pressure  
105 that restore these variables to their equilibrium values" ((Levy and  
106 Pappano, 2007), pg. 187).
- 107 – "[Frank-Starling mechanism] ... applies in particular to the coordination of  
108 the output of the two ventricles. Because the ventricles beat at the same  
109 rate, the output of the two can be matched only by adjustments of the  
110 stroke volume." ((Antoni, 1996), pg. 1814).

111 – “The heart maintains normal blood circulation under a wide range of  
112 workloads, a function governed by the Frank-Starling law” (Saks et al.,  
113 2006).

114 – “This important functional property of the heart supplies an essential  
115 regulatory mechanism by which cardiac output is intrinsically optimized  
116 relative to demand.”(Asnes et al., 2006).

117 Besides these citations, we can easily lengthen the list of those that, one way or  
118 another, consider the OP as an stable equilibrium point due to the FFm (e.g.,  
119 (Fuchs and Smith, 2001; Moss and Fitzsimons, 2002; Niederer et al., 2011)).

120 As we see from the above-mentioned literature, students and physicians are lead  
121 to consider the filling-force mechanism as giving stability to the system.

122 However, if we take the (apparent) stability of the cardiovascular system as a  
123 *prima facie* evidence of the (supposed) stability generated by the FFm, we risk  
124 ourselves to fall in a circular reasoning. Actually, the OP could well be a neutral  
125 equilibrium point or, even worst, an unstable node or focus, all compatible with  
126 the curves that describe the OP (see Fig. 1B as an example). In effect, during  
127 undergraduate and graduate disciplines, one of us (JGCB) has trouble in  
128 explaining the stability of the OP from the vascular and cardiac curves. If one  
129 examines with care the diagram, a perturbation in the OP would not be dampened  
130 in the following cycle(s) but instead, it would be amplified.

131 Why does this occur? Because the OP-diagram is not a diagram concerning the  
132 dynamical phase-space of the variables. It shows a static 2D relationship  
133 between a pair of variables that belong to a higher dimensional space: the curves  
134 are somehow projections of the null-clines of the whole system (note: in the case  
135 of one-ventricle hearts, as it will be also modelled, the OP-diagram is a construct  
136 from a lower dimensional space, but this is not really important here).

137 In plain English, the OP-diagram does not, and cannot, reveal how changes in  
138 one variable (say left cardiac output) alters the other (say central pulmonary  
139 venous pressure) because there are missing variables. If the vascular curve  
140 refers to the vena cava, then the cardiac curve should be for the right ventricle. If  
141 the vascular curve refers to the pulmonary veins, then the cardiac curve should  
142 be for the left ventricle. However, as usually presented, the OP diagram mixes up

143 the two sides of the heart. Once we recognize this, we understand that, for two-  
144 ventricle hearts, one needs four state variables to compose the whole picture  
145 (despite this obviously prevents a 2D representation): the systemic pressure, the  
146 right ventricle output, the pulmonary pressure and the left ventricle output.  
147 Therefore, there are two operation points: one for the left side and one for the  
148 right side of the heart.

149 In a more formal language, the diagram of the vascular and of the cardiac curves  
150 (Fig. 1) as obtained does not have an associated vector field in the phase-space  
151 that represents the possible trajectories of the system given a perturbation from  
152 the OP. Thus, the conundrum is whether the OP is a stable equilibrium point due  
153 to the filling-force mechanism, which, in the end, guaranties that both beat-to-  
154 beat variation and the matching between the ventricles can be sustained *without*  
155 *any regulatory loop extrinsic to the heart*.

156 The filling-force mechanism is found among all vertebrate classes, as stated in  
157 before. However, many vertebrates have single-ventricle hearts, and so, there is  
158 no match necessities between the outputs of two ventricles beating  
159 simultaneously. Moreover, exactly these vertebrates belong to the predecessor  
160 lines of the two-ventricle hearts of mammals, birds and some reptiles. Thus, in  
161 evolutive terms, the FFm precedes output-matching necessities.

162 Fishes regulate cardiac output mainly by systolic volume and it is considered that  
163 the FFm is responsible for the adjustment of ejection in face of large changes in  
164 ventricle volume (Shiels and White, 2008). The ascending limb of the relationship  
165 between developed tension and sarcomere length is much broader in these  
166 animals than in mammals and birds, indicating a wider range of adequate  
167 ventricular pressure responses in face of increases in chamber volume (Shiels  
168 and White, 2008). Despite the fact that these considerations seem to address the  
169 question of the stability of a given equilibrium point in fishes, in fact they are  
170 related to the transitions among operating points governed by a series of systemic  
171 changes (e.g., changes in metabolic demand, muscle contraction, autonomic  
172 tonus, etc.). Counterintuitively as it may sound, the latter, transitions, does not  
173 imply the former, stability, indeed.

174 The present study aims to answer the questions of the role of the filling-force  
175 mechanism in the stability of an operation point and of the role of the FFm in

176 output-matching. These questions are approached by the analysis of a dynamical  
177 system representing the acute and intrinsic coupling between cardiac output and  
178 central venous pressure. We analyze two settings of this coupling, one  
179 concerning the single ventricle system of fishes and the other concerning the two-  
180 ventricle system of mammals, birds and some reptiles. The settings are analyzed  
181 in two different scenarios: (A) the filling-force mechanism actuating in the  
182 ventricular chamber; and (B) a fixed force is exerted by a ventricular chamber.  
183 These two scenarios are intended to allow for a comparison of what would  
184 happen if the FFm were absent and so, to answer the proposed questions.

185

## 186 **Preliminary considerations**

### 187 **Mechanistic description and cardiac dynamics**

188 The functioning of the cardiovascular system is governed by a set of variables.  
189 This set includes vascular capacitances, vascular impedances, blood rheology,  
190 total blood volume, autonomic nervous system tonus (e.g., (Holubarsch et al.,  
191 1996; Hoppensteadt and Peskin, 2002)). For the purposes of the present  
192 analysis, these variables would be considered as constants during the timeframe  
193 of interest. This defines what is meant by “acute” and by “intrinsic” that we put  
194 above. In other words, we are saying that there is more than one time scale to  
195 describe the system, and we shall investigate one that operates at a rate  
196 compatible of a heartbeat interval. In doing so, we are lead to consider that in the  
197 vicinities of an OP the system behaves linearly.

198 In this instance, the total volume of fluid (explicitly, blood),  $V_T$ , is constant and  
199 equals the sum of the volumes in each compartment  $j$  of the system:

$$200 \quad V_T = \sum V_j \quad (1)$$

201 We use the Hagen-Poiseuille model to describe flow between two points  $i$  and  $j$   
202 of the circulatory system:

$$203 \quad \dot{q}_{i,j} = \frac{P_i - P_j}{R_{i,j}} \quad (2)$$



204 In which  $\dot{q}$  is the flow between compartments  $i$  and  $j$ ,  $P$  is the pressure in a  
205 given compartment and  $R$  is the resistance imposed to the flow between the  
206 compartments. Notice that the resistance term encloses physical constants of  
207 the system, such as mean radius and length of the vessels, viscosity of the  
208 fluid, etc.

209 The pressure in a given compartment  $j$  is the volume  $V$  of blood present in the  
210 compartment divided by the capacitance  $\beta$  of the compartment (here we  
211 consider the capacitance as a constant in the small range of volume variations  
212 we analyze):

$$213 \quad P_j = \frac{V_j}{\beta_j} \quad (3)$$

214 Eqn 1-3 form the core of the subsequent models in which the time variation in  
215 the volume of a given compartment  $j$  is the result of the inflow and outflow of  
216 blood:

$$217 \quad \frac{dV_j}{dt} = \dot{q}_{in} - \dot{q}_{out} \quad (4)$$

218 Since total volume is constant, then follows that:

$$219 \quad \sum \frac{dV_j}{dt} = 0 \quad (5)$$

220 As stated before, the timeframe of reference is related to a heartbeat, which is  
221 composed by two phases. During systole, the heart ejects but does not receive  
222 blood. During diastole, the reverse is true. Therefore, when we employ Eqn 4  
223 we are referring to mean values during the cardiac cycle. To incorporate such a  
224 cycle in the mean-valued model, we consider that, during diastole, the  
225 capacitance of the ventricle tends to infinity, and, therefore, the circulatory tree  
226 fills the heart against a near-zero pressure. During the systole, the ventricle  
227 develops a certain pressure (force), and this pressure is related to the volume of  
228 the ventricle. This is the filling-force mechanism, indeed.

229 The model is intended to study the behavior of the system near an operation  
230 point. Therefore, we employ a simple positive linear relationship between  
231 volume and pressure (force). This means that we are neither modeling any

232 transition between two distant operation points nor pathological conditions  
233 where the FFm might be inverted (i.e., the greater the ventricular volume the  
234 lower the developed force).

235

## 236 **Modeling and Results**

### 237 **From fish ... One-ventricle hearts**

238 Let the indexes H represent the heart chamber and S the vascular tree,  
239 respectively (Fig. 2).

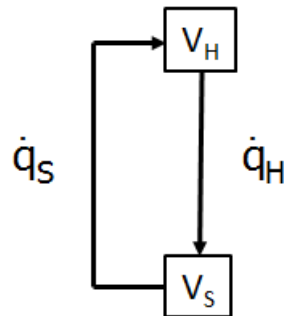

240

241 **Figure 2. Schematics of the model of the one-ventricle heart system.** The state variables  
242 heart volume ( $V_H$ ) and systemic volume ( $V_S$ ) are in boxes. The arrows indicate blood flows.

243

### 244 **Scenario (A): the filling-force mechanism actuating in the** 245 **ventricular chamber**

246 The outflow from the heart (inflow to the vascular tree) and the outflow from the  
247 vascular tree (inflow to the heart) are:

$$248 \quad \dot{q}_H = \frac{F \cdot V_H - V_S \cdot \beta_S^{-1}}{R_S} \quad (6)$$

$$249 \quad \dot{q}_S = \frac{V_S \cdot \beta_S^{-1}}{R_H} \quad (7)$$

250 In which  $F$  is the linear coefficient of the relationship between ventricle volume  
251 and developed pressure (the filling-force mechanism). For the sake of notation,  
252 we define:

253 
$$a = \frac{1}{R_S \cdot \beta_S}$$

254 
$$b = \frac{1}{R_H \cdot \beta_S}$$

255 
$$f = \frac{F}{R_S}$$

256 Coefficients a, b and f have units of [pressure] · [volume]<sup>-1</sup> · [resistance]<sup>-1</sup>. Since  
257 resistance to flow have units of [time] · [pressure] · [volume]<sup>-1</sup>, the coefficients end  
258 up as [time]<sup>-1</sup> (i.e., inverse of time-constants).

259 Because the time variation in total blood volume is zero (Eqn 5), then, from Eqn  
260 4, the system is described by the following differential equation:

261 
$$\frac{dV_H}{dt} = (a + b) \cdot V_T - (a + b + f) \cdot V_H \quad (8)$$

262 By equating dV<sub>H</sub>/dt to zero, we obtain the value of the cardiac volume (and,  
263 consequently, the one of the vascular tree as well) at the equilibrium point of the  
264 system, denoted by an “\*“:

265 
$$V_H^* = \frac{a + b}{a + b + f} \cdot V_T \quad (9)$$

266 In fact, Eqn 8 can be integrated straightway and we have:

267 
$$V_H(t) = \frac{a + b}{a + b + f} \cdot V_T \cdot (1 - e^{-(a+b+f) \cdot t}) \quad (10)$$

268 In which e is the base of the natural logarithm.

269

## 270 **Scenario (B): a fixed-force is exerted by a ventricular chamber**

271 We use the subscript “k” to indicate the parameters and the variables in this fixed-  
272 force scenario. The outflow from the heart (inflow to the vascular tree) becomes:

273 
$$\dot{q}_{Hk} = \frac{F_k - V_S \cdot \beta_S^{-1}}{R_S} \quad (11)$$

274 In which  $F_k$  is the fixed-force term. The outflow from the vascular tree (inflow to  
275 the heart) remains the same as in Eqn 6. The differential equation describing the  
276 dynamics of the system is now:

$$277 \quad \frac{dV_{HK}}{dt} = (a + b) \cdot V_T - f_k - (a + b) \cdot V_{HK} \quad (12)$$

278 Notice that the constant  $f_k$  has units of [volume] · [time]<sup>-1</sup>, i.e., flow. By integrating  
279 Eqn 12 results in:

$$280 \quad V_{HK}(t) = \left( V_T - \frac{f_k}{a + b} \right) \cdot \left( 1 - e^{-(a+b) \cdot t} \right) \quad (13)$$

281 And the value of the cardiac volume at the equilibrium point is:

$$282 \quad V_{HK}^* = V_T - \frac{f_k}{a + b} \quad (14)$$

283 Eqn 14 shows that, if the fixed-force term (represented by  $f_k$ ) is much greater than  
284 the sum of  $a + b$ , the heart chamber would become completely empty of blood.

285

## 286 **Stability of the Equilibrium Point**

287 Both Eqn 10 and 13 reveal that their respective equilibrium points are an  
288 asymptotically stable node: both eigenvalues are negative real numbers  
289 (e.g.,(Monteiro, 2011)). Therefore, irrespectively to the presence of the FFm, the  
290 one-ventricle circulatory system has a stable operation point.

291

## 292 **... to philosopher<sup>1</sup> - Two-ventricle hearts**

293 As stated in the Introduction, we need four state-variables to describe the two-  
294 ventricle hearts: left ventricle (L), systemic vascular bed (S), right ventricle (R)  
295 and pulmonary vascular bed (G – we use G for “Gas exchanger organ” instead  
296 of “P” that would cause confusion with pressure). See Fig. 3.

297

---

<sup>1</sup> “From Fish to Philosopher” is a classical book by Homer William Smith (1959).

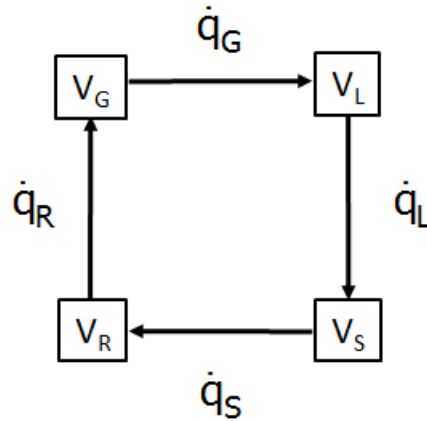

298

299 **Figure 3. Schematics of the model of the two-ventricles heart system.** The state variables  
 300 left ventricle volume ( $V_L$ ), systemic circulation volume ( $V_S$ ), right ventricle volume ( $V_R$ ) and gas-  
 301 exchanger circulation volume ( $V_G$ ) are in boxes. The arrows indicate blood flows.

302

303 **Scenario (A): the filling-force mechanism actuating in the**  
 304 **ventricular chamber**

305 Flows are given by the following equations:

306 
$$\dot{q}_L = \frac{F_L \cdot V_L - V_S \cdot \beta_S^{-1}}{R_S} = f_L \cdot V_L - a \cdot V_S \quad (15)$$

307 
$$\dot{q}_S = \frac{V_S \cdot \beta_S^{-1}}{R_R} = b \cdot V_S \quad (16)$$

308 
$$\dot{q}_R = \frac{F_R \cdot V_R - V_G \cdot \beta_G^{-1}}{R_G} = f_R \cdot V_R - c \cdot V_G \quad (17)$$

309 
$$\dot{q}_G = \frac{V_G \cdot \beta_G^{-1}}{R_L} = e \cdot V_G \quad (18)$$

310 In which we employ the same short notation as in the preceding section for the  
 311 sake of clarity. From the equations of flow and Eqn 5, we have the following set  
 312 of coupled differential equations to describe the system:

$$\begin{cases}
 \frac{dV_L}{dt} = e \cdot V_G + a \cdot V_S - f_L \cdot V_L \\
 \frac{dV_S}{dt} = f_L \cdot V_L - (a + b) \cdot V_S \\
 \frac{dV_G}{dt} = f_R \cdot (V_T - V_L - V_S - V_G) - (c + e) \cdot V_G
 \end{cases} \quad (19)$$

314 The volumes at the equilibrium point of the system are (we let  $V_S^*$  and  $V_G^*$  as  
 315 functions of  $V_L^*$ ):

$$316 \quad V_S^* = \frac{f_L}{a + b} \cdot V_L^*$$

$$317 \quad V_G^* = \frac{b \cdot f_L}{e \cdot (a + b)} \cdot V_L^*$$

$$318 \quad V_L^* = \frac{f_R \cdot e \cdot (a + b)}{f_R \cdot e \cdot (a + b) + f_L \cdot [f_R \cdot (b + e) + b \cdot (c + e)]} \cdot V_T \quad (20)$$

319 Just to check the feasibility of Eqn 20, if  $f_R = 0$ , i.e., the right ventricle has no  
 320 ejecting force at all, then the whole volume of blood would be retained in the right  
 321 ventricle, while if  $f_L = 0$ , then the volume is completely retained in the left ventricle.  
 322 If both  $f_R$  and  $f_L$  go to zero simultaneously, then one has a proportion of blood  
 323 retained in the right side and other in the left side, as in stagnation conditions.  
 324 These extreme results are in accordance with what one would anticipate within  
 325 this simplified framework of the circulatory system.

326

### 327 **Stability of the equilibrium point in the presence of the filling-** 328 **force mechanism**

329 The stability of the equilibrium point is given by setting the determinant of the  
 330 Jacobian of the system to zero:

$$331 \quad \begin{vmatrix} -f_L - \lambda & a & e \\ f_L & -(a + b) - \lambda & 0 \\ -f_R & -f_R & -f_R - c - e - \lambda \end{vmatrix} = 0 \quad (21)$$

332 In which  $\lambda$  is an eigenvalue of the system. This determinant corresponds to the  
 333 following characteristic equation:

334  $\lambda^3 + z_1 \cdot \lambda^2 + z_2 \cdot \lambda + z_3 = 0$

335 The coefficients  $z_i$  are:

336  $z_1 = a + b + c + e + f_L + f_R$

337  $z_2 = a \cdot c + a \cdot e + b \cdot c + b \cdot e + f_R \cdot a + f_R \cdot b + f_R \cdot e + f_L \cdot b + f_L \cdot c + f_L \cdot e + f_L \cdot f_R$

338  $z_3 = e \cdot f_R \cdot a + e \cdot f_R \cdot b + e \cdot f_L \cdot b + f_L \cdot c \cdot b + f_L \cdot e + b \cdot f_L \cdot f_R + e \cdot f_L \cdot f_R$

339 For the equilibrium point be asymptotically stable, the following conditions must  
340 be satisfied:

341 1.  $z_i > 0 \forall i$

342 2.  $z_1 \cdot z_2 > z_3$

343 Since all parameters are positive, condition 1 is satisfied. Plain inspection of the  
344 coefficients shows that condition 2 is also satisfied. Therefore, the equilibrium  
345 point of a two-ventricle system in the presence of the filling-force mechanism is  
346 asymptotically stable.

347

348 **Scenario (B): a fixed-force is exerted by a ventricular chamber**

349 The system is described by the following coupled differential equations, where  
350 the subscript  $k$  indicates the fixed force:

351 
$$\begin{cases} \frac{dV_L}{dt} = e \cdot V_G + a \cdot V_S - f_{kL} \\ \frac{dV_S}{dt} = f_{kL} - (a + b) \cdot V_S \\ \frac{dV_G}{dt} = f_{kR} - (c + e) \cdot V_G \end{cases} \quad (22)$$

352 The volumes of the compartments  $S$  and  $G$  at the equilibrium point of the system  
353 are:

354  $V_S^* = \frac{f_{kL}}{a + b}$

355  $V_G^* = \frac{f_{kR}}{c + e}$

356 From these values in the equation of  $dV_L/dt$ , we obtain that the following  
 357 relationship must hold in order to the system have an equilibrium point:

$$358 \quad f_{kL} \cdot b \cdot (c + e) = f_{kR} \cdot e \cdot (a + b) \quad (23)$$

359 Therefore, unless condition 23 is fulfilled, the system will not attain an equilibrium  
 360 point at all. Also notice that the volumes of two compartments are not obtained  
 361 (see below – in this case, these volumes are from the left and the right ventricles,  
 362 but this due to the form that we delineate system 22 – the relevant point is that  
 363 there are two unknown volumes).

364

### 365 **Stability of the equilibrium point in the presence of a fixed-force** 366 **of ejection**

367 We obtain the following determinant of the Jacobian of the system 22:

$$368 \quad \begin{vmatrix} -\lambda & a & e \\ 0 & -(a+b)-\lambda & 0 \\ 0 & 0 & -(c+e)-\lambda \end{vmatrix} = 0 \quad (24)$$

369 Therefore, the system has an asymptotically stable subspace with two real  
 370 eigenvalues ( $\lambda_1 = -(a + b)$  and  $\lambda_2 = -(c + e)$ ) and a central manifold corresponding  
 371 to  $\lambda_3 = 0$ . This central manifold represents the indeterminacy of the two volumes  
 372 ( $V_L$  and  $V_R$  in this case). Let  $V_H = V_L + V_R$ . Since:

$$373 \quad \frac{dV_H}{dt} = \frac{dV_L}{dt} + \frac{dV_R}{dt} = -\frac{dV_S}{dt} - \frac{dV_G}{dt}$$

374 The system becomes simply:

$$375 \quad \begin{cases} \frac{dV_S}{dt} = f_{kL} - (a + b) \cdot V_S \\ \frac{dV_G}{dt} = f_{kR} - (c + e) \cdot V_G \end{cases} \quad (25)$$

376 In a very similar way of what happens in the case of the one-ventricle hearts, the  
 377 system is asymptotically stable even in the absence of the filling-force mechanism  
 378 and, considering condition (23), one way to write the heart volume is:



$$379 \quad V_H^* = V_T - \frac{f_{KR}}{c+e} \cdot \left( \frac{b+e}{b} \right) \quad (26)$$

380

## 381 **Discussion**

382 The stability of the operation point of the cardiovascular system is usually taken  
383 for granted as a result of the Frank-Starling Law, i.e., the filling-force mechanism  
384 of the heart. However, the OP diagram does not convey sufficient information to  
385 conclude that such an intrinsic mechanism of the myocardium truly would bring  
386 up stability to the system in a beat-to-beat basis.

387 In the present study, we approach this question by investigating the behavior of  
388 a dynamical system, representing a circulatory system, in the vicinity of an  
389 operation point. In such a vicinity, the temporal variation of a set of relevant  
390 physical variables in the cardiovascular system is taken as null, i.e., we  
391 investigate the behavior of the system within a fast time scale, roughly  
392 corresponding to the heartbeat interval. In this sense, all the sympathovagal  
393 inputs to the heart are considered as constants, as well as changes in blood  
394 volume, rheological factors, etc.

395 The first important conclusion of the study is that both types of circulatory  
396 systems, i.e., one-ventricle and two-ventricle hearts, are asymptotically stable  
397 even in the absence of the filling-force mechanism. In other words, if a given  
398 operation point exists, it is stable, and the system will return to such an OP after  
399 suffering a perturbation, irrespectively of the presence of the FFm (and without  
400 any extrinsic regulatory loop).

401 Therefore, the question now becomes more inclusive, since one has to  
402 understand the role of the filling-force mechanism without evoking its alleged and  
403 putative responsibility in stabilizing the operation point.

404 Due to the similar results between the systems with one and two ventricles, let  
405 us focus in the one-ventricle heart for simplicity. Eqn 9 and 14 describe the  
406 volume in the heart compartment for one system with and for another one without  
407 the filling-force mechanism, respectively. Fig. 4 shows a plot of these functions

408 (the 5% volume line is indicated simply as a reference to a usual value of the  
409 volume in the heart in relation to the volume of blood).

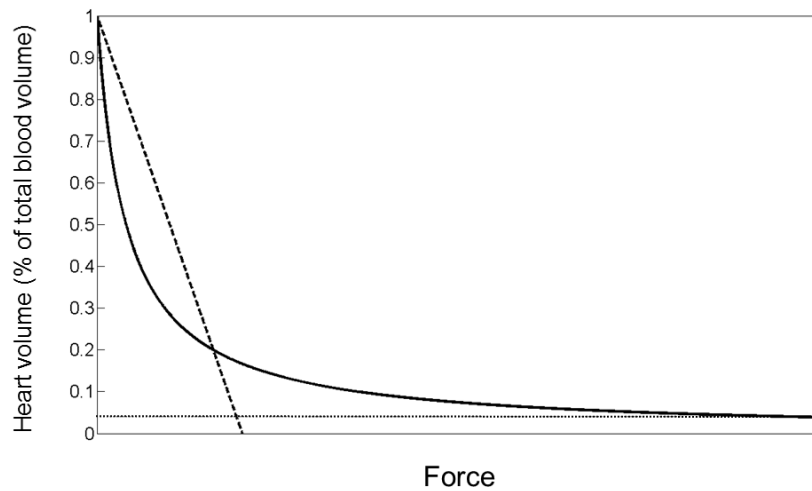

410

411 **Figure 4. Comparison between the effects of varying the force terms in the two different**  
412 **scenarios analyzed** (Eqn 9 and 14). The y-axis represents the fraction of blood in the cardiac  
413 chamber in relation to total blood volume. The x-axis represents force, i.e., the terms  $f$  and  $f_k$  (it  
414 must be kept in mind that  $f$  and  $f_k$  have different dimensions). Continuous line: volume in the  
415 scenario with the filling-force mechanism. Dashed line: volume in the scenario with a fixed-force  
416 exerted by the ventricular chamber. Dotted line: 5% of total blood volume. The sum of the terms  
417  $a$  and  $b$  in both Eqn 9 and 14 is 1 for the simulations shown in the plot.

418

419 Despite the risk of becoming repetitive, let us put it once again: both scenarios  
420 allow for the existence of stable OPs. In addition, as already stated (see Results),  
421 if the force term tends to zero, the total blood volume tends to be retained in the  
422 cardiac chamber (left-hand side in Fig. 4). In the vicinities of the zero-force, the  
423 heart volume of the system with the filling-force mechanism shows a steeper  
424 relationship with force than the fixed-force system. However, from a certain  
425 volume down, the linear relationship of the fixed-force becomes steeper than the  
426 asymptote of the filling-force mechanism system. Thus, close to the range of  
427 reasonable heart volumes, the fixed-force system shows a higher variation in the  
428 volumes of its compartments in face of variations in force, while the filling-force  
429 system has a smooth response.

430 Controlling effort (e.g. (Kirk, 2012 pg. 259; Todorov and Jordan, 2002)) and  
431 computational complexity (e.g. (Benenti, G. Casati, G. Strini, 2007 pg. 24; Moller  
432 and Smolka, 1965)) are somehow related to energy waste and resources

433 allocation by the controller system or the resolution algorithm in a given task.  
434 Considering that the resistances, capacitances and even the myocardial force  
435 itself (irrespective to the scenario) are under adjustments regulated by the  
436 autonomous nervous system, the smoothness brought by the filling-force  
437 mechanism ends up as a lower effort on the controller unit (i.e., lower energy  
438 demand and/or use of system resources).

439 Inspection of Eqn 20 shows that the controller unit can operate a variation in one  
440 given parameter (say, systemic resistance in the coefficient “a”) and the  
441 circulatory system will self-adjust its volumes accordingly. On the other hand, in  
442 the scenario with fixed-force terms, inspection of Eqn 23 shows that the controller  
443 unit must operate simultaneous variations in at least two parameters in order to  
444 guarantee the working of the system.

445 Thus, the second conclusion we can draw is that the filling-force mechanism has  
446 a role in decreasing the controlling effort external to the circulatory system (note  
447 that this has nothing to do with the stability of an operation point discussed  
448 above). The absence of the FFm does not preclude variations to be operated in  
449 the circulation, but the presence of the FFm smooths out perturbations more  
450 easily.

451 Then, the next inevitable question is whether the filling-force mechanism plays  
452 some role in heart rate variability. Heart rate suffers variations on a beat-to-beat  
453 basis. The most prominent are changes associate to ventilation (respiratory sinus  
454 arrhythmia), but many other factors are also interconnected to these variations,  
455 resulting in a multifaceted composition of frequencies. The beat-to-beat  
456 modulation of heart rate is due to a number of feedback loops that end up through  
457 a common dual efferent path, the sympathetic and parasympathetic branches of  
458 the autonomic nervous system (e.g., (Aubert et al., 2003; Stauss, 2003)). Also,  
459 there might exist some intrinsic innervation in the heart itself whose role is not  
460 well established (Stauss, 2003). This modulation gives rise to the so-called “heart  
461 rate variability”, and such a variability is an important sign of an adequate  
462 functioning of the cardiovascular system (e.g., (Stauss, 2003; TASK FORCE,  
463 1996)).

464 In this sense, the third relevant conclusion of the present study comes from the  
465 inspection of the eigenvalues of a system with the filling-force mechanism and of

466 a similar system (i.e., a system with the same set of values for the parameters of  
467 the vascular bed) with a fixed ejection force. For the one-ventricle hearts, this can  
468 be directly evaluated in Eqn 10 and 13 for the cases with the FFm and without it,  
469 respectively. Considering that the volume of blood in the heart is approximately  
470 5% of the total blood volume, from Eqn 9 we obtain that the filling-force term  
471 would be roughly 19-fold greater than the sum of the other two terms, a and b.  
472 This results in a returning to the operation point twenty times faster in the  
473 presence of the filling-force mechanism than in its absence.

474 For the two-ventricle hearts without the FFm, the eigenvalues of the stable sub-  
475 space are shown in Eqn 24. Although we did not directly compute the eigenvalues  
476 of two-ventricle hearts when the filling-force mechanism is present, we can have  
477 a glimpse of what occurs in them. Because the sum of the eigenvalues of a  
478 system equals the trace of the Jacobian matrix, then we can observe that both  
479 terms  $f_L$  and  $f_R$ , related to the filling-force mechanism, take part in at least one of  
480 the eigenvalues of the system (see Eqn 21). Therefore, similarly to what happens  
481 in the one-ventricle hearts, two-ventricle systems will also return to the operation  
482 point faster in the presence of the filling-force mechanism than in its absence.

483 Thus, our third conclusion is in regard of the time-constant of a system: the filling-  
484 force mechanism allows for a much faster return to an operation point after a  
485 perturbation. In other words, despite the fact that an existing operation point is  
486 stable even in the absence of the FFm, its presence guaranties the operation  
487 point to be regained in a fraction of the time than if there were no such a  
488 mechanism.

489 Heuristically, we might consider that when the system transits from a previous  
490 operation point to a new one, the former is a perturbation in relation to the latter  
491 (notice that this is not the mathematical definition of “perturbation”). In this sense,  
492 the transition among operation points would be speeded up by the filling-force  
493 mechanism. In a similar line of reasoning, this speeding up potentially contributes  
494 to non-autonomic components of heart rate variability, particularly in the high-  
495 frequency range.

496 In conclusion, differently from what is currently held, the filling-force mechanism  
497 is not necessary in order to give stability to an operation point in a circulatory  
498 system, whether composed by a heart with a single or with two ventricles. Our

499 modelling supports that the role of the filling-force mechanism is related to  
500 decrease the controlling effort over the circulatory system, to smooth out  
501 perturbations and to guarantee faster transitions among operation points.

502

## 503 **Acknowledgements**

504 JGCB is grateful to his graduate students who discussed a preliminary version of  
505 the mathematical model.

506

## 507 **Competing interests**

508 No competing or financial interests declared.

509

## 510 **Funding**

511 This research received no specific grant from any funding agency in the public,  
512 commercial or not-for-profit sectors.

## 513 **Supporting Data and Data Availability**

514 This study has no supporting material or data.

515

516

## 517 **References**

518 **Antoni, H.** (1996). Functional properties of the heart. In *Comprehensive Human*  
519 *Physiology* (ed. Greger, R.) and Windhorst, U.), pp. 1801–1823.  
520 Heidelberg: Springer-Verlag.

521 **Asnes, C. F., Marquez, J. P., Elson, E. L. and Wakatsuki, T.** (2006).  
522 Reconstitution of the Frank-Starling mechanism in engineered heart  
523 tissues. *Biophys. J.* **91**, 1800–10.

- 524 **Aubert, A. E., Seps, B. and Beckers, F.** (2003). Heart rate variability in  
525 athletes. *Sports Med.* **33**, 889–919.
- 526 **Benenti, G., Casati, G., Strini, G.** (2007). *Principles of quantum computation and*  
527 *information volume I.* Singapore: World Scientific Publishing Co.
- 528 **Brengelmann, G. L.** (2003). A critical analysis of the view that right atrial  
529 pressure determines venous return. *J. Appl. Physiol.* **94**, 849–859.
- 530 **Campbell, K. B. and Chandra, M.** (2006). Functions of Stretch Activation in  
531 Heart Muscle. **127**, 89–94.
- 532 **Fuchs, F. and Smith, S. H.** (2001). Calcium, cross-bridges, and the Frank-  
533 Starling relationship. *News Physiol. Sci.* **16**, 5–10.
- 534 **Holubarsch, C., Ruf, T., Goldstein, D. J., Ashton, R. C., Nickl, W., Pieske,**  
535 **B., Pioch, K., Ludemann, J., Wiesner, S., Hasenfuss, G., et al.** (1996).  
536 Existence of the Frank-Starling Mechanism in the Failing Human Heart:  
537 Investigations on the Organ, Tissue, and Sarcomere Levels. *Circulation* **94**,  
538 683–689.
- 539 **Hoppensteadt, F. C. and Peskin, C. S.** (2002). *Modeling and simulation in*  
540 *medicine and the life sciences.* 2nd ed. New York: Springer-Verlag.
- 541 **Katz, A. M.** (2002). Ernest Henry Starling, His Predecessors, and the “Law of  
542 the Heart.” *Circulation* **106**, 2986–2992.
- 543 **Kirk, D.** (2012). *Optimal Control Theory: An Introduction.* reprint. Courier  
544 Corporation.
- 545 **Levy, M. N. and Pappano, A. J.** (2007). *Cardiovascular physiology.* 9th ed.  
546 Philadelphia: Mosby-Elsevier.
- 547 **Moller, F. and Smolka, S. A.** (1965). On the Computational Complexity of  
548 Algorithms. *Trans. Am. Math. Soc.* **117**, 285.
- 549 **Monteiro, L. H. A.** (2011). *Sistemas dinâmicos.* 3rd ed. São Paulo: Editora  
550 Livraria da Física.
- 551 **Moss, R. L. and Fitzsimons, D. P.** (2002). Frank-Starling Relationship. *Circ.*  
552 *Res.* **90**, 11–13.
- 553 **Niederer, S. A. and Smith, N. P.** (2009). The Role of the Frank–Starling Law in

- 554 the Transduction of Cellular Work to Whole Organ Pump Function: A  
555 Computational Modeling Analysis. *PLoS Comput. Biol.* **5**, e1000371.
- 556 **Niederer, S. A., Plank, G., Chinchapatnam, P., Ginks, M., Lamata, P.,**  
557 **Rhode, K. S., Rinaldi, C. A., Razavi, R. and Smith, N. P.** (2011). Length-  
558 dependent tension in the failing heart and the efficacy of cardiac  
559 resynchronization therapy. *Cardiovasc. Res.* **89**, 336–343.
- 560 **Saks, V. A., Kuznetsov, A. V., Vendelin, M., Guerrero, K., Kay, L. and**  
561 **Seppet, E. K.** (2004). Functional coupling as a basic mechanism of  
562 feedback regulation of cardiac energy metabolism. *Mol. Cell. Biochem.*  
563 **256**, 185–199.
- 564 **Saks, V., Dzeja, P., Schlattner, U., Vendelin, M., Terzic, A. and Wallimann,**  
565 **T.** (2006). Cardiac system bioenergetics: metabolic basis of the Frank-  
566 Starling law. *J. Physiol.* **571**, 253–273.
- 567 **Shiels, H. and White, E.** (2008). The Frank-Starling mechanism in vertebrate  
568 cardiac myocytes. *J. Exp. Biol.* **211**, 2005–13.
- 569 **Solaro, R. J.** (2007). Mechanisms of the Frank-Starling Law of the Heart: The  
570 Beat Goes On. *Biophys. J.* **93**, 4095–4096.
- 571 **Stauss, H. M.** (2003). Heart rate variability. *Am. J. Physiol. - Regul. Integr.*  
572 *Comp. Physiol.* **285**, R927–R931.
- 573 **TASK FORCE** (1996). Heart rate variability. Standards of measurement,  
574 physiological interpretation, and clinical use. Task Force of the European  
575 Society of Cardiology and the North American Society of Pacing and  
576 Electrophysiology. *Eur. Heart J.* **17**, 354–81.
- 577 **Todorov, E. and Jordan, M. I.** (2002). Optimal feedback control as a theory of  
578 motor coordination. *Nat. Neurosci.* **5**, 1226–35.
- 579
- 580

## 581 **Figure Legends**

582 **Figure 1. Cardiovascular operation point. (A)** Usual representation of the  
583 cardiac and vascular functions resulting in an operation point of the heart. **(B)**  
584 Pictorial representation of a non-stable equilibrium (operation) point (an unstable  
585 focus in this case). The solid arrow represents an arbitrary perturbation from the  
586 operation point; the dashed lines represent a possible evolution path. This path  
587 is only for illustrative purposes and based on a cobwebbing approach of discrete  
588 dynamical systems.

589

590 **Figure 2. Schematics of the model of the one-ventricle heart system.** The  
591 state variables heart volume ( $V_H$ ) and systemic volume ( $V_S$ ) are in boxes. The  
592 arrows indicate blood flows.

593

594 **Figure 3. Schematics of the model of the two-ventricles heart system.** The  
595 state variables left ventricle volume ( $V_L$ ), systemic circulation volume ( $V_S$ ), right  
596 ventricle volume ( $V_R$ ) and gas-exchanger circulation volume ( $V_G$ ) are in boxes.  
597 The arrows indicate blood flows.

598

599 **Figure 4. Comparison between the effects of varying the force terms in the**  
600 **two different scenarios analyzed** (Eqn 9 and 14). The y-axis represents the  
601 fraction of blood in the cardiac chamber in relation to total blood volume. The x-  
602 axis represents force, i.e., the terms  $f$  and  $f_k$  (it must be kept in mind that  $f$  and  $f_k$   
603 have different dimensions). Continuous line: volume in the scenario with the  
604 filling-force mechanism. Dashed line: volume in the scenario with a fixed-force  
605 exerted by the ventricular chamber. Dotted line: 5% of total blood volume. The  
606 sum of the terms  $a$  and  $b$  in both Eqn 9 and 14 is 1 for the simulations shown in  
607 the plot.

608
